# Supplementary material for: In vitro reconstitution of epigenetic reprogramming in the human germ line
Source: PubMed Central journal article supplement (PMC11222161; doi:10.1038/s41586-024-07526-6), 2024-05-20
Supplement: 41586_2024_7526_MOESM1_ESM.pdf [file 41586_2024_7526_MOESM1_ESM.pdf]

**Supplementary information**

---

**In vitro reconstitution of epigenetic reprogramming in the human germ line**

---

In the format provided by the authors and unedited

## ***In vitro* reconstitution of epigenetic reprogramming in the human germ line**

Yusuke Murase,<sup>1,2,#</sup> Ryuta Yokogawa,<sup>1,2,#</sup> Yukihiro Yabuta,<sup>1,2</sup> Masahiro Nagano,<sup>1,2</sup> Yoshitaka Katou,<sup>1,2</sup> Manami Mizuyama,<sup>1,2</sup> Ayaka Kitamura,<sup>1,2</sup> Pimpitcha Puangsricharoen,<sup>1,2</sup> Chika Yamashiro,<sup>2</sup> Bo Hu,<sup>1,2</sup> Ken Mizuta,<sup>1,2</sup> Kosuke Ogata,<sup>3</sup> Yasushi Ishihama,<sup>3</sup> and Mitinori Saitou<sup>1,2,4</sup>

<sup>1</sup>Institute for the Advanced Study of Human Biology (ASHBi), Kyoto University, Yoshida-Konoe-cho, Sakyo-ku, Kyoto 606-8501, Japan.

<sup>2</sup>Department of Anatomy and Cell Biology, Graduate School of Medicine, Kyoto University, Yoshida-Konoe-cho, Sakyo-ku, Kyoto 606-8501, Japan.

<sup>3</sup>Department of Molecular Systems BioAnalysis, Graduate School of Pharmaceutical Sciences, Kyoto University, Kyoto 606-8501, Japan.

<sup>4</sup>Center for iPS Cell Research and Application (CiRA), Kyoto University, 53 Kawahara-cho, Shogoin, Sakyo-ku, Kyoto 606-8507, Japan.

<sup>#</sup>These authors contributed equally to this work.

*\*Correspondence should be addressed to:*

Mitinori Saitou, M.D., Ph.D.

E-mail: [saitou@anat2.med.kyoto-u.ac.jp](mailto:saitou@anat2.med.kyoto-u.ac.jp)

Tel: +81-75-753-4335; Fax: +81-75-751-7286 (MS)

## **Table of Contents**

### **Supplementary Figure 1. Validation of the AG, DT, and VT reporters.**

An orthogonal validation of the expression of fluorescent reporters (AG, DT, VT) during BMP-driven hPGCLC differentiation by immunofluorescence analysis.

### **Supplementary Figure 2. FACS gating used in this study.**

The gating for fluorescence activated cell sorting (FACS) used in this study is shown.

### **Supplementary Figure 3. Uncropped data for Extended Data Fig. 5i**

Uncropped data of Western blot analysis for Extended Data Fig. 5i.

### **Supplementary Discussion 1.**

Discussion on the activities of fluorescent reporters (AG, DT, VT) during BMP-driven hPGCLC differentiation.

### **Supplementary Discussion 2.**

Discussion on the mechanism of epigenetic reprogramming during mouse and human PGC(LC) differentiation.

## **Supplementary Tables, see the separate Excel documents**

### **Supplementary Table 1. Expression matrix of bulk RNA-seq.**

Gene expression matrix of the bulk RNA-seq data presented in Fig. 2 and Fig. 4.

### **Supplementary Table 2. Overview of bulk RNA-seq, scRNA-seq, EM-seq, ONT long-read-seq samples.**

Overview of the samples used for bulk RNA-seq, scRNA-seq, EM-seq, ONT long-read-seq analyses in this study.

### **Supplementary Table 3. List of DEGs between BMP-driven and xrOvary-based hPGCLC differentiation, and of HVGs in AG<sup>+</sup>DT<sup>-</sup> cells cultured with or without BMP2, and their associated GO terms.**

List of differentially expressed genes (DEGs) between BMP-driven and xrOvary-based hPGCLC differentiation (Extended Data Fig. 5c), and of highly variable genes (HVGs) in AG<sup>+</sup>DT<sup>-</sup> cells cultured with or without BMP2 (Extended Data Fig. 5d–g), and their associated GO terms. *p*-values are provided by Fisher's exact test.

### **Supplementary Table 4. Lists of DEGs between germ cells *in vivo* and *in vitro* in EM, M or PLL stages, and associated GO terms.**

Lists of differentially expressed genes (DEGs) between germ cells *in vivo* and *in vitro* in

early mitotic (EM), mitotic (M) or pre-leptotene (PLL) stages (Extended Data Fig. 6d), and their associated GO terms. *p*-values are provided from Fisher's exact test.

**Supplementary Table 5. Statistic values of EM-seq analysis.**

Average 5mC methylation levels of relevant genomic elements and of gene promoters [900 bp upstream and 400 bp downstream of transcription start sites (TSS)] in autosomes and X chromosomes in relevant cell types analyzed in this study (Fig. 3 and Extended Data Fig. 7–9).

**Supplementary Table 6. Haplotype phasing of chromosome X.**

Results of the haplotype phasing of the X chromosomes of F1- and F2-AGVT hiPSCs by ONT long-read-sequence.

**Supplementary Table 7. Composition of DNA demethylation escapees.**

Composition of the DNA demethylation escapees in the relevant cell types analyzed in this study (Fig. 3 and Extended Data Fig. 8).

**Supplementary Table 8. Allelic expression and promoter DNA methylation of X-linked genes, and demethylation escapees.**

Allelic expression and promoter DNA methylation of X-linked genes, and demethylation escapees in the relevant cell types analyzed in this study (Extended Data Fig. 9e).

**Supplementary Table 9. List of DEGs between wild-type and *TET1* KO cells, and associated GO terms.**

List of differentially expressed genes (DEGs) between wild-type and *TET1* KO cells during hPGCLC induction and differentiation, and their clustering and associated GO terms. *p*-values are provided from Fisher's exact test.

**Supplementary Table 10. Information of cytokines, chemicals, and culture media.**

List of cytokines, chemicals, their concentrations, and culture media used in this study (Extended Data Fig. 1).

**Supplementary Table 11. DNA oligonucleotides used in this study.**

Sequence information of DNA oligonucleotides for genotyping, reporter construction, knockout by CRISPR, and qPCR used in this study.

**Supplementary Table 12. Information of parameters for quality filtering.**

Summary of samples, sequencers, quality control filters, and sequence data of the scRNA-seq in this study (Fig. 2c–f, Extended Data Fig. 6).

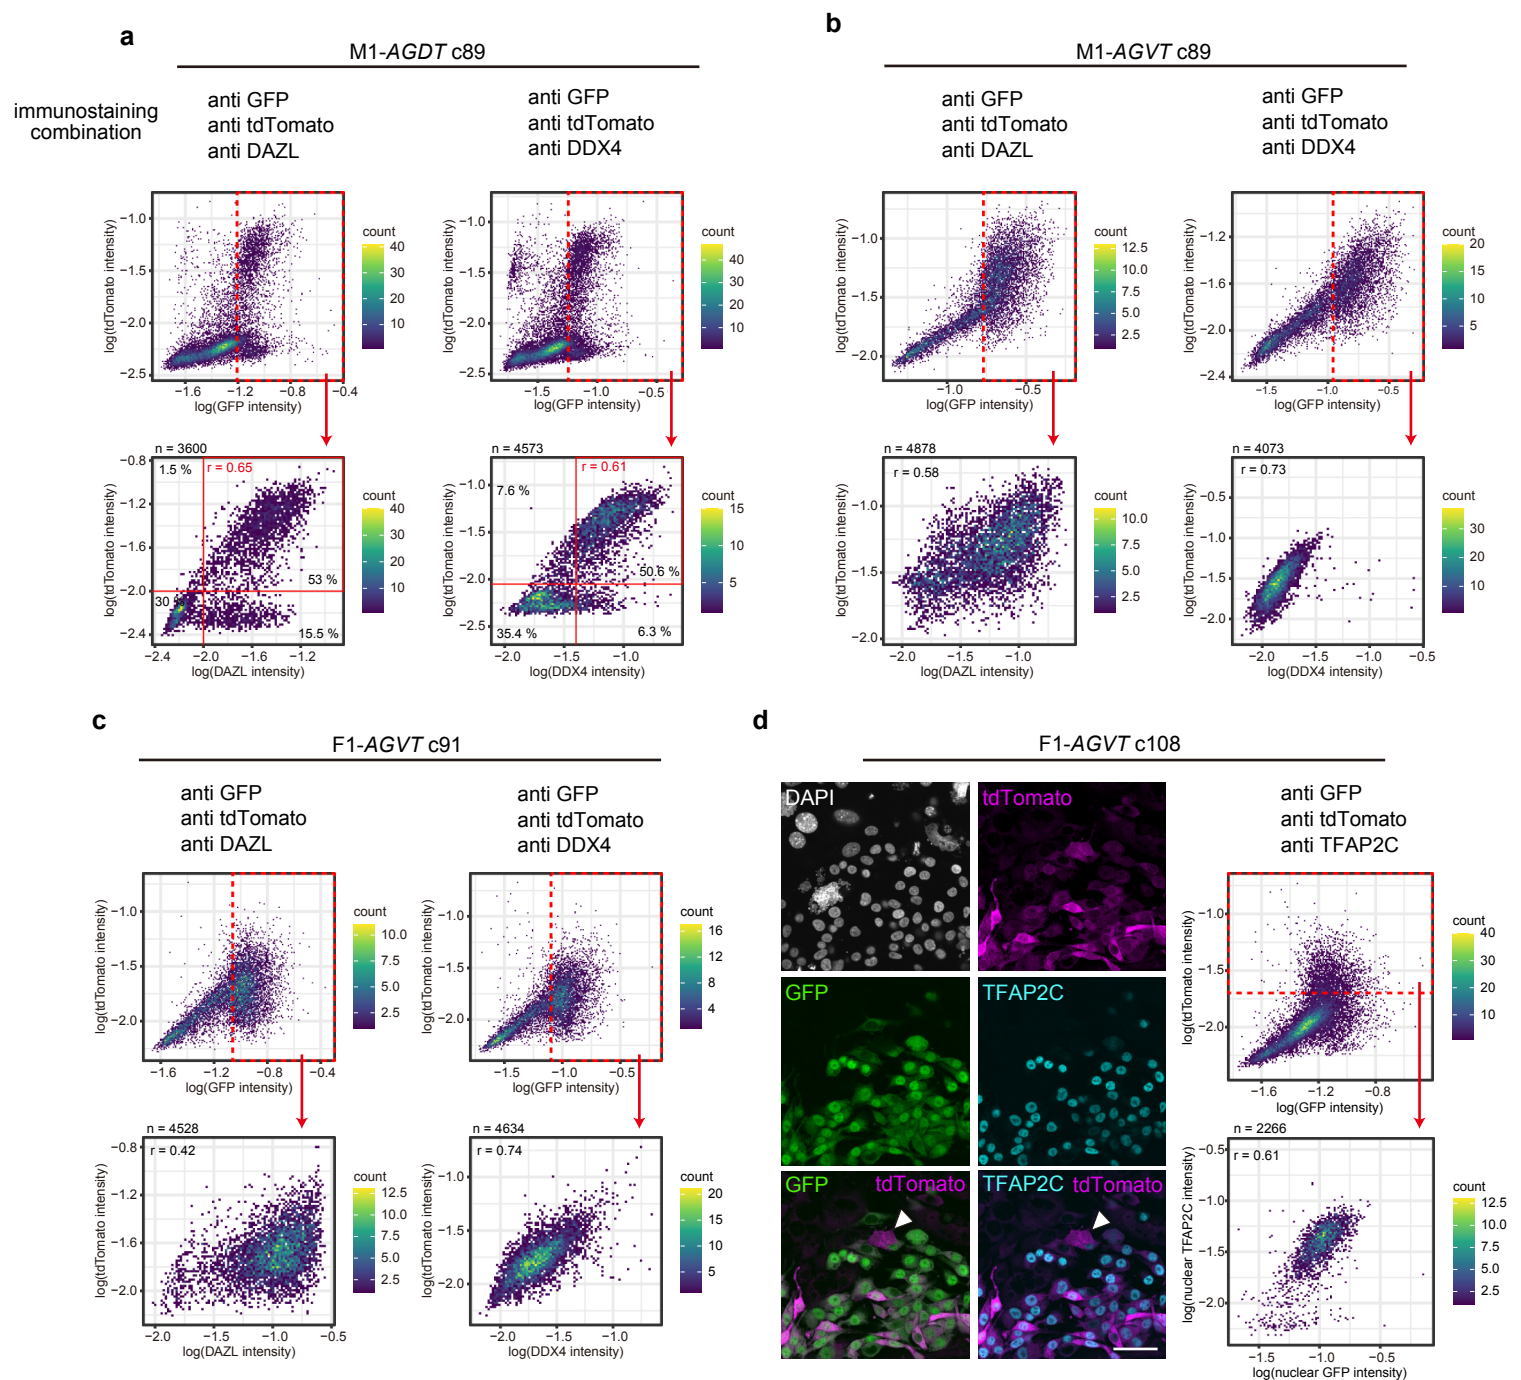**Supplementary Figure 1. Validation of the AG, DT, and VT reporters.**

**a**, IF analysis of GFP, tdTomato, DAZL, and DDX4 expression in M1-AGDT hPGCLC-derived cells at c89. (top) Scatter-plot representations of the expression levels [ $\log(\text{fluorescence intensity})$ ] of GFP (AG) and tdTomato (DT) in the c89 cells stained with anti-GFP, anti-tdTomato, and anti-DAZL (left) or anti-DDX4 (right) antibodies. Red-dotted boxed areas were determined as GFP+ (AG+). GFP- and tdTomato- cells include m220 feeders.

(bottom) Scatter-plot representations of the expression levels [ $\log(\text{fluorescence intensity})$ ] of DAZL (left) or DDX4 (right) and tdTomato (DT) in the GFP+ (AG+) cells. Red vertical and horizontal bars indicate a threshold for the DAZL (left) or DDX4 (right) and tdTomato (DT) positivity, respectively. The color coding is as indicated.

**b**, IF analysis of GFP, tdTomato, DAZL, and DDX4 expression in M1-AGVT hPGCLC-derived cells at c89. Scatter-plot representations are as in (a).

**c**, IF analysis of GFP, tdTomato, DAZL, and DDX4 expression in F1-AGVT hPGCLC-derived cells at c91. Scatter-plot representations are as in (a).

**d**, IF analysis of GFP, tdTomato, and TFAP2C expression in F1-AGVT hPGCLC-derived cells at c108. (left) Representative images for GFP, tdTomato, and TFAP2C expression and their merges as indicated. All AG-VT+ (GFP-tdTomato+) cells (18 cells) were TFAP2C- (arrowheads). Bar, 50  $\mu\text{m}$ . (right) Scatter-plot representations are as in (a). Among VT+ cells, GFP (AG) and TFAP2C expression levels were highly correlated ( $r = 0.61$ ). The color coding is as indicated.

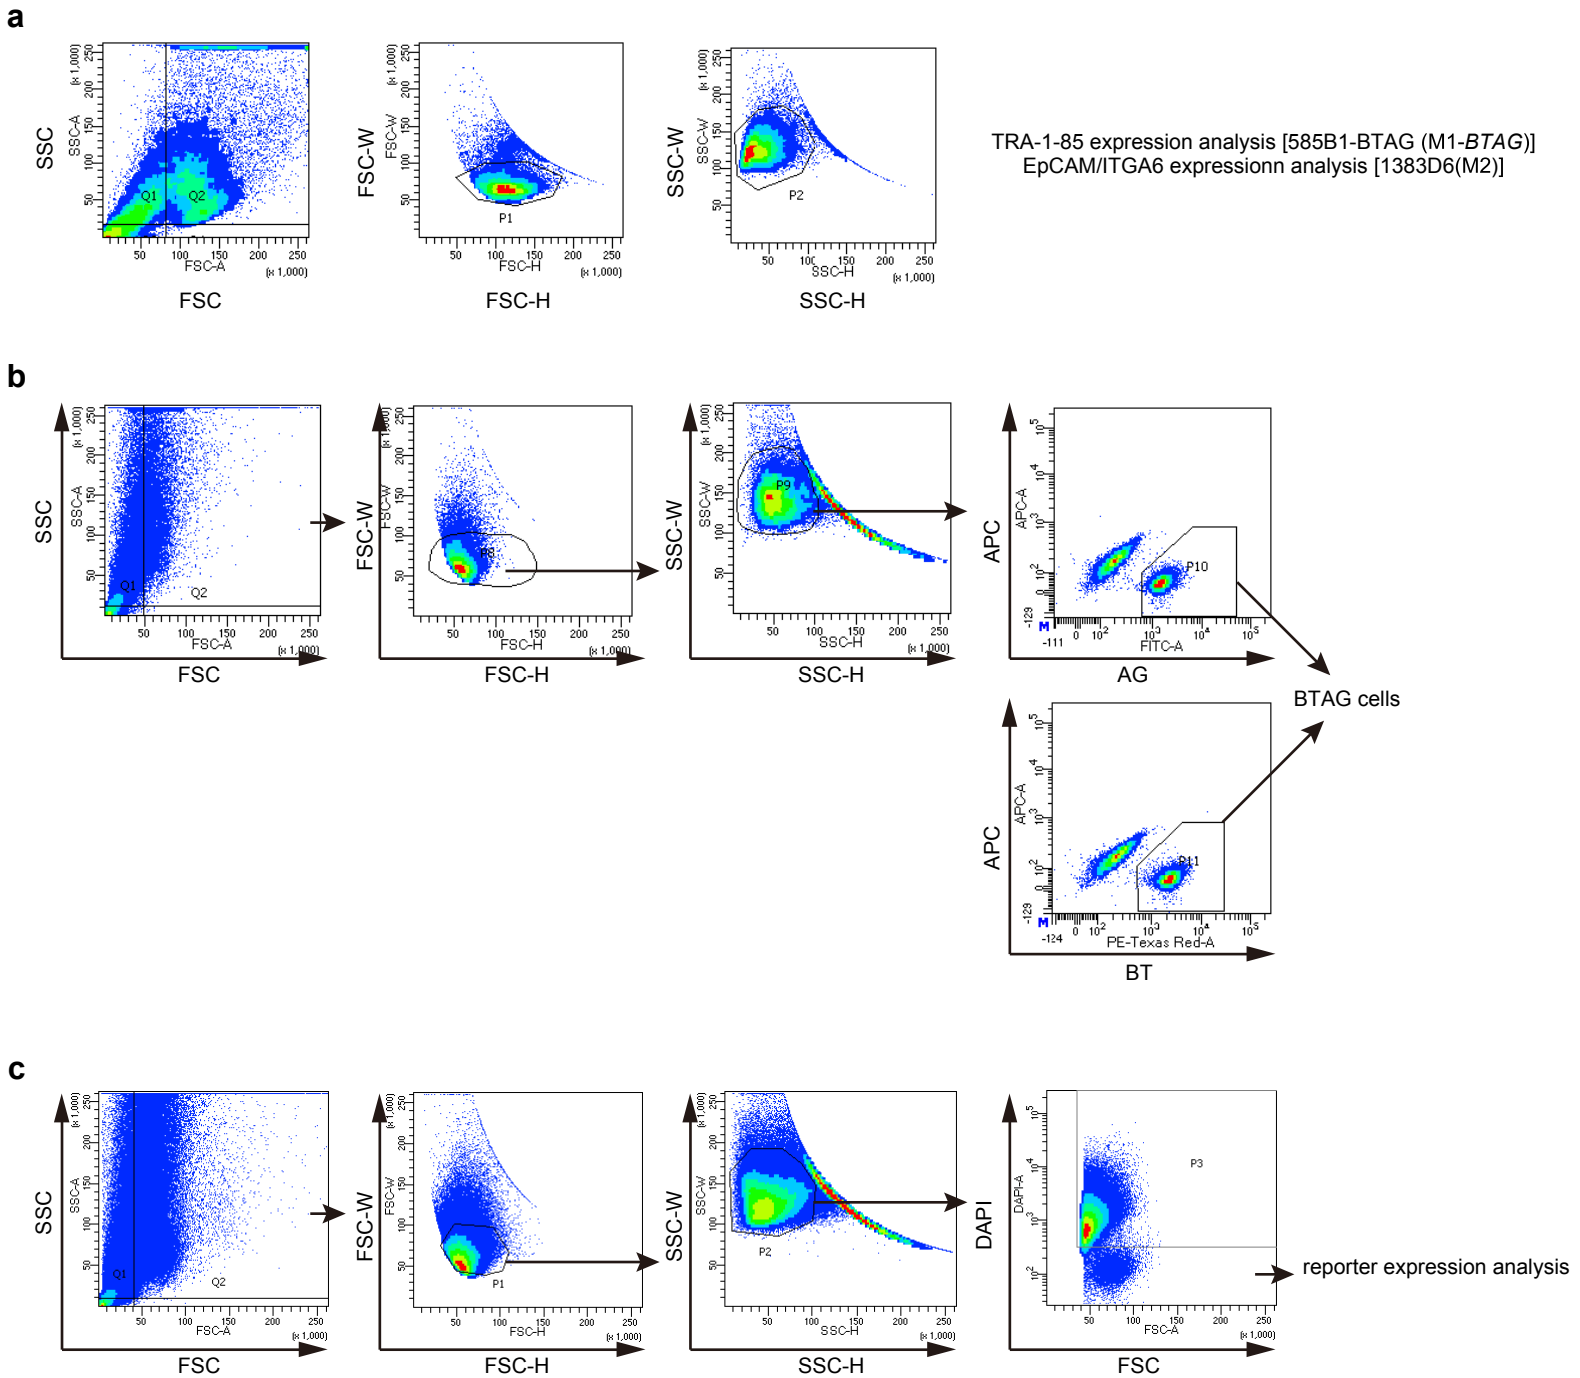

**Supplementary Figure 2. FACS gating used in this study.**

**a**, Identification of the cell population used for surface antigen expression analysis in hPGCLC expansion/differentiation culture experiments using 585B1-BTAG (M1-BTAG) or 1383D6 (M2) lines.

**b**, Identification of BTAG cells in hPGCLC expansion/differentiation culture experiments using 585B1-BTAG (M1-BTAG) or *TET1* KO lines.

**c**, Identification of the cell population used for the reporter expression analysis in hPGCLC expansion/differentiation culture experiments using 585B1-AGDT/AGVT (M1-AGDT/AGVT), NCLCN-AGVT (F1-AGVT), and 1390G3-AGVT (F2-AGVT) lines.

Experiment 1

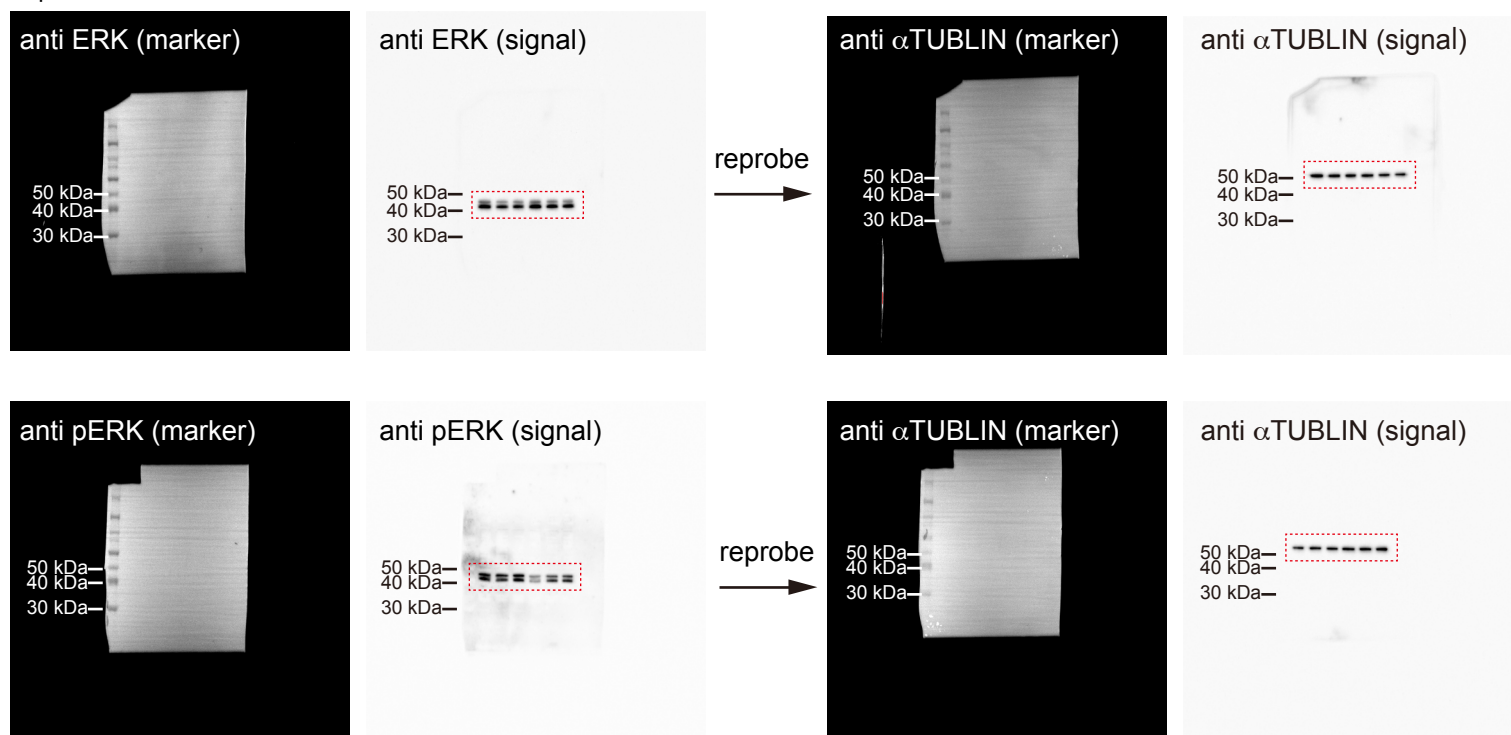

Experiment 2

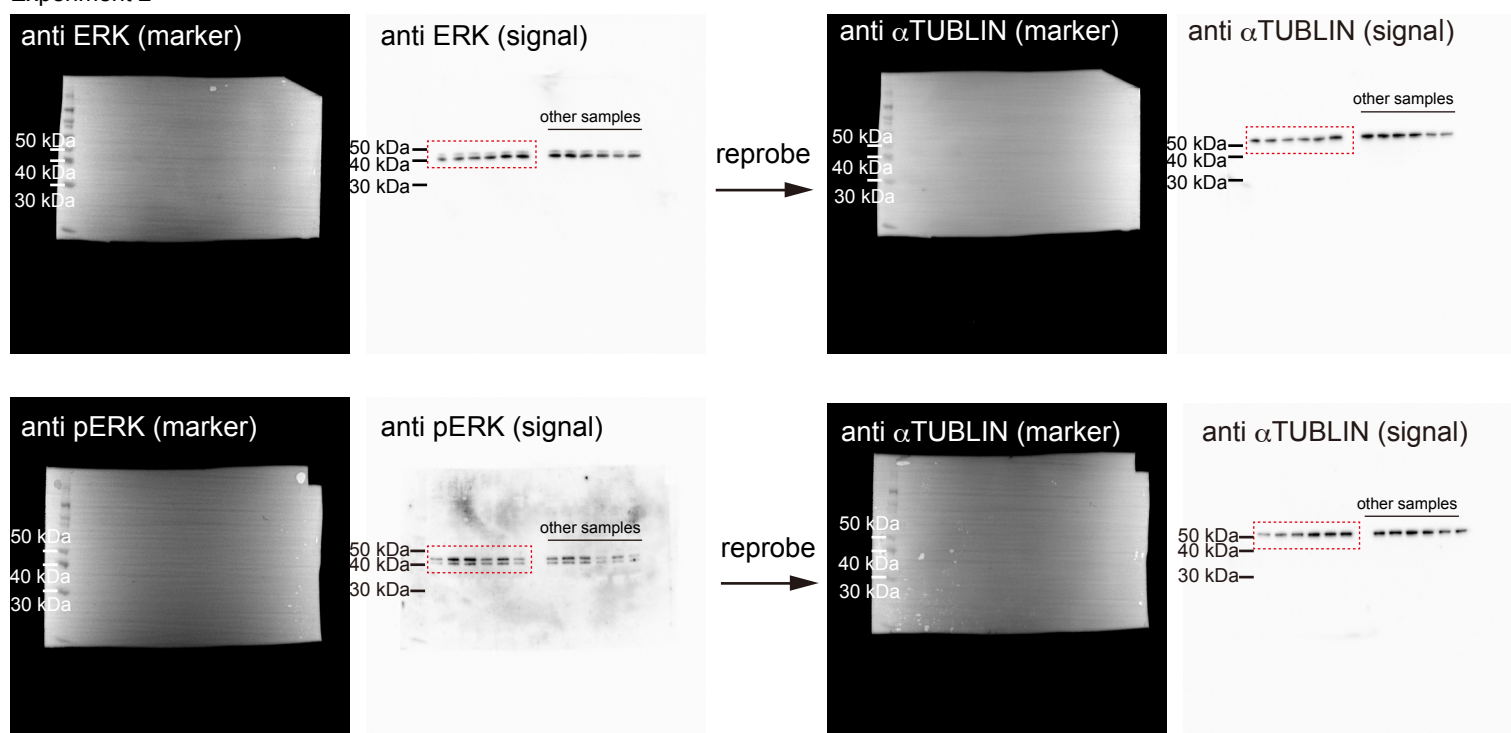

**Supplementary Figure 3. Uncropped data for Extended Data Figure. 5i.**

Uncropped images of the Western blot analysis shown in Extended Data Fig. 5i of the levels of phosphorylated or total ERK1 and 2 in M1-AGDT hPGCLC-derived cells at c33 cultured with or without BMP2. Three independent cultures were analyzed for two biological replicates (Experiment 1 and 2). The light dotted boxes indicate the regions of interest.  $\alpha$ TUBULIN was used for the loading control. pERK: phosphorylated ERK.

### Supplementary Discussion 1

We performed an orthogonal validation of the DT and VT reporters. First, we conducted an IF analysis of DAZL and DDX4 expression in M1-*AGDT* hPGCLC-derived cells at c89. This revealed that 1) essentially all DT<sup>+</sup> cells were DAZL<sup>+</sup>, with the expression levels of DT and DAZL showing an excellent correlation ( $r = \sim 0.65$ ); 2) on the other hand,  $\sim$ one-third of DT<sup>-</sup> cells exhibited low/middle-level DAZL positivity; and 3) essentially all DAZL<sup>-</sup> cells were DT<sup>-</sup> (Supplementary Figure 1a). In accord with these findings, 4) essentially all DT<sup>+</sup> cells were DDX4<sup>+</sup>, with the expression levels of DT and DDX4 showing a strong correlation ( $r = \sim 0.61$ ); 5) a fraction ( $\sim 15\%$ ) of DT<sup>-</sup> cells exhibited low/middle-level DDX4 positivity; and 6) the vast majority of all DDX4<sup>-</sup> cells were DT<sup>-</sup> (Supplementary Figure 1a). These findings demonstrate that the DT positivity is a powerful quantitative indicator for DAZL (and DDX4) expression, while on the other hand, the DT<sup>-</sup> cells (at a late stage) include a fraction of DAZL- (and DDX4-) expressing cells at low/middle levels, which may be due to a sporadic selective transcriptional/post-transcriptional silencing of the DT allele during BMP-driven hPGCLC differentiation.

Next, we performed IF analysis of DAZL and DDX4 expression in M1-*AGVT* hPGCLC-derived cells at c89. This revealed that 1) the expression levels of VT and DDX4 were highly correlated in all expression-level ranges ( $r = \sim 0.73$ ) and 2) DAZL was broadly expressed from VT<sup>-low</sup> to VT<sup>high</sup> cells, with the expression levels of VT and DAZL showing a mild correlation ( $r = \sim 0.58$ ) (Supplementary Figure 1b). These findings demonstrate that VT is a faithful reporter for DDX4 expression, and are consistent with the notion that DAZL begins to be expressed earlier than VT. The IF analysis for F1-*AGVT* hPGCLC-derived cells at c91 gave essentially the same results (Supplementary Figure 1c).

Furthermore, we performed IF analysis of TFAP2C and DDX4 expression in F1-*AGVT* hPGCLC-derived cells at c109. This revealed that 1) essentially all AG<sup>+</sup> cells were TFAP2C<sup>+</sup> and 2) all AG<sup>-</sup>VT<sup>+</sup> cells we detected were TFAP2C<sup>-</sup> and DDX4<sup>+</sup> (Supplementary Figure 1d), demonstrating that AG is also a faithful reporter for TFAP2C expression.

Collectively, these findings demonstrate that both DT and VT positivity monitor DAZL and DDX4 expression in a highly quantitative manner, while care should be taken for DT<sup>-</sup> cells, which include a fraction of DAZL<sup>+</sup> (and DDX4<sup>+</sup>) cells, although the majority are indeed DAZL<sup>-</sup> (and DDX4<sup>-</sup>). Accordingly, we assume that the detection of a relatively high level of *DDX4* in one, but not the other, replicate for the c82 AG<sup>+</sup>DT<sup>-</sup> cells (Extended Data Fig. 4q) was due to a relatively large proportion of *DDX4*-expressing cells in the former, and that the detection of *DDX4* at a low level in AG<sup>+</sup>VT<sup>-</sup> cells at c44, c65, and c86 and of *TFAP2C* at a low level in the AG<sup>-</sup>VT<sup>+</sup> cells at c107 (Fig. 2a) was due to an inclusion of VT<sup>low</sup> and AG<sup>low</sup> cells, respectively, upon FACS of the AG<sup>+</sup>VT<sup>-</sup> and



AG<sup>-</sup>VT<sup>+</sup> cell population (Fig. 1c) [note also that the “yield” mode for FACS inevitably sorts in a fraction of non-gated cells].

## Supplementary Discussion 2

Mouse germ cells reduce their 5mCs from ~75% to ~5% over a week with an expansion of  $\sim 2^9$ -fold (from ~40 to ~25,000 cells)<sup>97-99</sup>, diminishing their 5mCs by ~8% per cell cycle on average. In contrast, human germ cells reduce their 5mCs from ~80% to ~5% over ~5 weeks with an expansion of  $\sim 2^{10}$ -fold (from ~40 to ~40,000 cells)<sup>3,100-102</sup>, decreasing their 5mCs by ~7.5% per cell cycle on average. Thus, mouse and human germ cells reduce 5mCs at a similar rate per cell cycle, and accordingly, the difference in time scale for genome-wide DNA demethylation between mice and humans might simply reflect the difference in the doubling time between mouse (~0.8 days on average) and human germ cells (~3.5 days on average). This would further support the notion of a replication-dependent, passive mechanism, which is non-species specific, as the primary mechanism underlying genome-wide DNA demethylation. Unlike mPGCLCs, which reduce their 5mCs by ~10% per cell cycle on average<sup>103</sup>, hPGCLC-derived cells from 3 out of 4 hiPSC lines reduce their 5mCs at a lower rate (~3–5%) per cell cycle (Extended Data Fig. 9l), indicating that the hPGCLC differentiation condition would necessitate additional optimization, including the provision of additional factors. Indeed, *UHRF1* remained at a slightly higher level during BMP-driven hPGCLC differentiation than during *in vivo* hPGC differentiation (Fig. 2a), and the former requires substantial propagation for genome-wide demethylation. Given that BMP-driven hPGCLC differentiation displays an attenuation of the MAPK/ERK signalling (Extended Data Fig. 5g–j), a fine tuning of the balance between BMP and MAPK/ERK signalling could be a key for such optimization. On the other hand, hPGCLC-derived cells from F2-*AGVT* reduce their 5mCs by ~7.6% per cell cycle, but with a prolonged doubling time (~8.8 days) (Extended Data Fig. 9l), which might be due to a variance of signalling efficiency associated with this line.

- 97 Tam, P. P. & Snow, M. H. Proliferation and migration of primordial germ cells during compensatory growth in mouse embryos. *J Embryol Exp Morphol* **64**, 133-147 (1981).
- 98 Seisenberger, S. *et al.* The dynamics of genome-wide DNA methylation reprogramming in mouse primordial germ cells. *Mol Cell* **48**, 849-862 (2012). <https://doi.org/10.1016/j.molcel.2012.11.001>
- 99 Kagiwada, S., Kurimoto, K., Hirota, T., Yamaji, M. & Saitou, M. Replication-coupled passive DNA demethylation for the erasure of genome imprints in mice. *EMBO J* **32**, 340-353 (2013). <https://doi.org/10.1038/emboj.2012.331>
- 100 Gkoutela, S. *et al.* DNA Demethylation Dynamics in the Human Prenatal Germline. *Cell* **161**, 1425-1436 (2015). <https://doi.org/10.1016/j.cell.2015.05.012>
- 101 Guo, F. *et al.* The Transcriptome and DNA Methylome Landscapes of Human Primordial Germ Cells. *Cell* **161**, 1437-1452 (2015). <https://doi.org/10.1016/j.cell.2015.05.015>
- 102 Mamsen, L. S., Lutterrodt, M. C., Andersen, E. W., Byskov, A. G. & Andersen, C. Y. Germ cell numbers in human embryonic and fetal gonads during the first two trimesters of pregnancy: analysis of six published studies. *Hum Reprod* **26**, 2140-2145 (2011). <https://doi.org/10.1093/humrep/der149>
- 103 Ohta, H. *et al.* In vitro expansion of mouse primordial germ cell-like cells recapitulates an epigenetic blank slate. *EMBO J* **36**, 1888-1907 (2017). <https://doi.org/10.15252/emboj.201695862>
